# Supplementary material for: SF3B4 promotes ovarian cancer progression by regulating alternative splicing of RAD52
Source: PubMed Central journal article supplement (PMC8873359; doi:10.1038/s41419-022-04630-1), 2022-02-24
Supplement: 41419_2022_4630_MOESM2_ESM.pdf [file 41419_2022_4630_MOESM2_ESM.pdf]

Please complete the table below to indicate the contributions of all named authors to the figures.

Figure 1:

B.K ,Y. L and Y.D generated the data and prepared the Figure; Z.W and S.W labelled the image.

Figure 2:

Y.D generated the data; P.L labelled the image. Y. L assembled the figure.

Figure 3:

Y.D generated the data; P.L labelled the image. Y. L assembled the figure.

Figure 4:

Y.D generated the data; P.L labelled the image. Y. L assembled the figure.

Figure 5:

Y.D generated the data; Z.W labelled the image. Y. L assembled the figure.

Figure 6:

Y.D generated the data; S.W labelled the image. Y. L assembled the figure.

Signed for and on behalf of the Author(s):

Print Name:

Date:

Yuchao Diao Zixiang Wang Shourong Wang

Yuchao Diao, Zixiang Wang, Shourong Wang, Peng Li, Yingwei Li, Beihua Kong

2021/10/07

Peng Li Yuchao Diao  
Kongwei Li Beihua Kong
